# Supplementary material
Source: ML conference proceedings conference paper supplement (https://openaccess.thecvf.com/content/CVPR2023/html/Jung_On_the_Importance_CVPR_2023_paper.html)
Supplement: Supplementary file 2 [file Jung_On_the_Importance_CVPR_2023_supplemental.zip]

Archive with 2 entries (2 files):
- CVPR2023_Importance_suppl-compressed_mid.mp4
- CVPR2023_Importance_suppl-compressed_mid.pdf
